# Supplementary material for: The NIN-Like Protein OsNLP2 Negatively Regulates Ferroptotic Cell Death and Immune Responses to Magnaporthe oryzae in Rice
Source: MDPI journal article supplement (doi:10.3390/antiox11091795), 2022-09-12
Supplement: s1 [file s1]

**Table S1.** Primers used in this study.

| Gene name     |     | Sequence (5'-3')                  | Description                |
|---------------|-----|-----------------------------------|----------------------------|
| OsNLP2        | F-1 | AAAAAGCAGGCTTCATGGATATGCCTACG     | Subcellular localization   |
|               | R-1 | AGAAAGCTGGGTTTATGAGCTATGTGC       |                            |
| RWP-RK domain | F-1 | AAAAAGCAGGCTTCATGAATATTAGCTTG     |                            |
| PB1 domain    | F-1 | AAAAAGCAGGCTTCATGCTGACAGTTAAG     |                            |
| OsNLP2        | F-2 | CGACGACAAGACCCTATGGATATGCCTACGCCA | Transient expression       |
|               | R-2 | GAGGAGAAGAGCCCTTTATGAGCTATGTGCCGC |                            |
| RWP-RK domain | F-2 | CGACGACAAGACCCTATGAATATTAGCTTGGAT |                            |
| PB1 domain    | F-2 | CGACGACAAGACCCTATGCTGACAGTTAAGGCA |                            |
| OsNLP2 RT     | LP  | GCATCAAGCCACCCTACCTT              | Transcription analysis     |
|               | RP  | TCACGATTGCGGACCCTATG              |                            |
| OsNLP2        | FP  | ATGGATATGCCTACGCCATC              | Complementary construction |
|               | RP  | CTTGAGGTCCATTCTGGCACCCCA          |                            |
| OsNLP2        | F   | GAGCCAAGGAATCTCCTCTCTTC           | Genotyping                 |
|               | R   | CTTGAGGTCCATTCTGGCACCCCA          |                            |
| T-DNA 2715    | RB  | GTTACGTCCTGTAGAAACCCCAA           |                            |
| OsPBZ1        | F   | GCTACAGGCATCAGTGGTCA              | qRT-PCR                    |
|               | R   | GACTCAAACGCCACGAGAAT              |                            |
| OsPIP 3A      | F   | TCATCCTCGTCTACACCGTC              |                            |
|               | R   | CACCCAGAAGATCCAGTGGT              |                            |
| OsWRKY90      | F   | ATGGCCAGCAGTAGCGACCATG            |                            |
|               | R   | CTCTCTGTTTCTCTCAAACCTGA           |                            |
| OsWRKY104     | F   | TGCCATTACTCCGAGCGAC               |                            |
|               | R   | ATTGTGAGGTGCTTGAGCCA              |                            |
| OsRbohB       | F   | GAATTCATGGCTGACCTGGAAGCAGGCA      |                            |
|               | R   | CTCGAGTTAGAAGTTCTCCTTGTGGAAA      |                            |
| OsUbiquitin   | F   | GTGGTGGCCAGTAAGTCCTC              |                            |
|               | R   | GGACACAATGATTAGGGATCA             |                            |

\*F, forward; R, reverse; LP, left primer; RP, right primer; FP, forward primer; RB, right border.

**Table S2.** Accession numbers of NLP proteins used in this study.

| Plant                                       | Gene name   | Accession number             |
|---------------------------------------------|-------------|------------------------------|
| <i>Arabidopsis thaliana</i>                 | AtNLP1      | AT2G17150                    |
|                                             | AtNLP2      | AT4G35270                    |
|                                             | AtNLP3      | AT4G38340                    |
|                                             | AtNLP4      | AT1G20640                    |
|                                             | AtNLP5      | AT1G76350                    |
|                                             | AtNLP6      | AT1G64530                    |
|                                             | AtNLP7      | AT4G24020                    |
|                                             | AtRKD1      | AT1G18790                    |
|                                             | AtRKD2      | AT1G74480                    |
|                                             | AtRKD3      | AT5G66990                    |
|                                             | AtRKD4      | AT5G53040                    |
|                                             | AtRKD5      | AT4G35590                    |
| <i>Medicago truncatula</i>                  | MtNLP1      | Medtr2g099350                |
|                                             | MtNLP2      | Medtr4g068000                |
|                                             | MtNLP3      | Medtr1g100970                |
| <i>Brachypodium distachyon</i>              | BdNLP1      | Bradi1g76340                 |
|                                             | BdNLP2      | Bradi4g37147                 |
|                                             | BdNLP3      | Bradi 4g20717 & Bradi4g20730 |
|                                             | BdNLP4      | Bradi5g23300                 |
|                                             | BdNLP5      | Bradi3g03170                 |
|                                             | BdNLP6      | Bradi2g31710                 |
|                                             | BdNLP7      | Bradi2g08177                 |
| <i>Oryza sativa</i><br>ssp. <i>japonica</i> | OsNLP1      | Os03g03900                   |
|                                             | OsNLP2      | Os04g41850                   |
|                                             | OsNLP3      | Os01g13540                   |
|                                             | OsNLP4      | Os09g37710                   |
|                                             | OsNLP5      | Os11g16290                   |
|                                             | OsNLP6      | Os02g04340                   |
|                                             | OsRKD1      | Os01g14420                   |
|                                             | OsRKD3      | Os01g37100                   |
|                                             | OsRKD4      | Os04g47640                   |
|                                             | OsRKD5      | Os06g12360                   |
|                                             | OsRKD6      | Os02g51090                   |
|                                             | OsRKD7      | Os08g19820                   |
|                                             | OsRKD8      | Os12g12970                   |
|                                             | OsRKD9      | Os09g27190                   |
|                                             | OsRKD10     | Os02g20530                   |
|                                             | OsPBZ1      | Os12g36880                   |
|                                             | OsPIP 3A    | Os09g36930                   |
|                                             | OsWRKY90    | Os09g30400                   |
|                                             | OsWRKY104   | Os11g02520                   |
|                                             | OsRbohB     | Os01g25820                   |
|                                             | OsUbiquitin | Os06g46770                   |
